# Supplementary material
Source: publisher site journal article supplement (https://kjim.org/upload/media/kjim-2025-281-Supplementary-Table-3.pdf)
Supplement: Supplementary file 1 [file kjim-2025-281-Supplementary-Table-3.pdf]

Supplementary Table 3. Study characteristics and assessment tools used

| Author, year                 | Study design                          | Patients                                                                                                         | Diagnostic tool(s)                   | Intervention                 | Evaluative tool(s)                   | Assessment interval                                                   | Reported outcomes                                                                                                                                                                                                                                                                                                                            |
|------------------------------|---------------------------------------|------------------------------------------------------------------------------------------------------------------|--------------------------------------|------------------------------|--------------------------------------|-----------------------------------------------------------------------|----------------------------------------------------------------------------------------------------------------------------------------------------------------------------------------------------------------------------------------------------------------------------------------------------------------------------------------------|
| Mileskin et al., 2006 [17]   | Prospective observational study       | 75 MM patients enrolled in a multicenter trial of dose-escalating thalidomide and/or interferon                  | NCS; NCI CTCAE                       | -                            | NCS; NCI CTCAE                       | Weekly for 24 weeks and then monthly from baseline                    | The actual incidence of neuropathy increased from 38% at 6 months to 73% at 12 months, with 81% of responding patients developing this complication                                                                                                                                                                                          |
| Richardson et al., 2006 [18] | Prospective observational study       | 256 MM patients treated with bortezomib                                                                          | FACT/GOG-NTX                         | -                            | FACT/GOG-NTX                         | Baseline; on day 1 of cycles 3, 5, and 7; and study end               | Neuropathy led to dose reduction in 12% and discontinuation in 5% of patients                                                                                                                                                                                                                                                                |
| Lanzani et al., 2008 [19]    | Prospective observational study       | 48 MM patients treated with bortezomib                                                                           | TNS-R; VAS                           | -                            | TNS-R; VAS                           | Baseline, and 2 and 4 cycles of treatment                             | The clinical course of bortezomib-induced PN was more severe in patients with the highest baseline TNS-R                                                                                                                                                                                                                                     |
| Cartoni et al., 2012 [20]    | Prospective observational study       | 44 MM patients treated with bortezomib                                                                           | -                                    | Controlled-release oxycodone | NRS                                  | Baseline and days 3, 7, and 14 from treatment initiation              | The pain intensity decreased from a mean NRS of 7.6 at baseline to 1.3 on day 14                                                                                                                                                                                                                                                             |
| Thomas et al., 2012 [21]     | Abstract                              | 20 MM patients receiving bortezomib or thalidomide                                                               | NRS; CINAS                           | -                            | NRS; CINAS                           | At the time of referral                                               | CINAS demonstrated validity, reliability, and sensitivity in patients with MM during and after chemotherapy                                                                                                                                                                                                                                  |
| Briani et al., 2013 [22]     | Retrospective observational study     | 30 MM patients previously treated with bortezomib and/or thalidomide and starting lenalidomide and dexamethasone | TNS-C; NRS                           | -                            | TNS-C; NRS                           | Baseline and 6 and 12 months from beginning of lenalidomide treatment | At baseline, 53.3% patients had chemotherapy-induced PN (mean TNS-C 5.8); after 6 months, PN condition was unchanged in 13 patients, improved in 1 patient, and worsened in 2 patients; after 12 months, the patient who had improved remained stable, and the condition of the 2 patients who had worsened returned to baseline TNS-C value |
| Callander et al., 2014 [23]  | Prospective randomized clinical trial | 19 MM patients treated with bortezomib, doxorubicin, and oral low-dose dexamethasone                             | FACT/GOG-NTX; FACIT-Fatigue; NPI; GP | -                            | FACT/GOG-NTX; FACIT-Fatigue; NPI; GP | Baseline, cycle 3, and end of study                                   | Patient-reported fatigue and PN measured by FACT/GOG-NTX increased, although time to complete GP testing shortened                                                                                                                                                                                                                           |

**Supplementary Table 3. Continued**

| Author, year                  | Study design                          | Patients                                                                                        | Diagnostic tool(s)           | Intervention                                                                                                    | Evaluative tool(s)        | Assessment interval                                                              | Reported outcomes                                                                                                                                                           |
|-------------------------------|---------------------------------------|-------------------------------------------------------------------------------------------------|------------------------------|-----------------------------------------------------------------------------------------------------------------|---------------------------|----------------------------------------------------------------------------------|-----------------------------------------------------------------------------------------------------------------------------------------------------------------------------|
| Cho et al., 2014 [24]         | Retrospective cohort study            | 55 MM patients who had received bortezomib-dexamethasone or bortezomib-melphalan-prednisone     | NCI CTCAE                    | Modified dosage and schedule of bortezomib                                                                      | FACT/GOG-NTX              | 1st, 8th, 16th, and 24th administration of bortezomib                            | Neuropathy symptoms significantly decreased after the intervention                                                                                                          |
| Garcia et al., 2014 [25]      | Prospective observational study       | 19 MM patients affected by PN                                                                   | NCI CTCAE (grade 2 or above) | Electroacupuncture                                                                                              | FACT/GOG-NTX; BPI-SF, NCS | Baseline and weeks 4, 9, and 13 from treatment                                   | From baseline to week 13, significant improvements in FACT/GOG-NTX score were observed                                                                                      |
| Zaroulis et al., 2014 [26]    | Prospective observational study       | 10 MM patients sequentially evaluated with the TNS-R after bortezomib administration            | TNS-R; NCS                   | -                                                                                                               | TNS-R; NCS                | Before bortezomib initiation and 6 and 12 months after bortezomib administration | Patients showed a significantly increased TNS-R score 6 months after bortezomib administration, while TNS-R values were slightly reduced 12 months later but not normalized |
| Dalla Torre et al., 2016 [27] | Prospective cohort study              | 19 MM patients treated with lenalidomide and dexamethasone                                      | TNS-C; NCS                   | Long-term lenalidomide treatment (2 years or 5 years)                                                           | TNS-C; NCS                | At baseline and at 1, 2, or 5 years after lenalidomide treatment initiation      | No correlation was found between lenalidomide cumulative dose and neuropathy                                                                                                |
| Han et al., 2017 [28]         | Prospective randomized clinical trial | 104 MM patients                                                                                 | NCI CTCAE (grade 2 or above) | Acupuncture and/or methylcobalamin                                                                              | VAS; FACT/GOG-NTX; NCS    | Before and after treatment                                                       | Fact/GOG-NTX score and NCS significantly improved in the acupuncture combined with methylcobalamin group                                                                    |
| Lakshmanan et al., 2017 [29]  | Prospective observational study       | 26 treatment-naive MM patients receiving weekly cyclophosphamide, bortezomib, and dexamethasone | TNS-R; TNS-C; NCI CTCAE; NCS | -                                                                                                               | TNS-R; TNS-C; NCI CTCAE   | Baseline, and termination of treatment                                           | Among 12 patients who did not have PN by NCI CTCAE scale, 41.7% and 16.7% patients satisfied the criteria for PN by TNS-R and TNS-C, respectively                           |
| Zhi et al., 2018 [30]         | Prospective cohort study              | 27 MM patients treated with bortezomib                                                          | NCI CTCAE (grade 2 or above) | 10 acupuncture treatment; twice weekly for the first 2 weeks, weekly for 4 weeks, and then biweekly for 4 weeks | NPS; FACT/GOG-NTX         | Weekly at baseline, during, and after acupuncture treatment                      | The acupuncture group showed statistically significant reductions in individual symptoms in both NPS and FACT/GOG-NTX instruments                                           |

Supplementary Table 3. Continued

| Author, year                 | Study design                                | Patients                                                                                                   | Diagnostic tool(s)                                                                                                          | Intervention                                                                     | Evaluative tool(s)                          | Assessment interval                                 | Reported outcomes                                                                                                                                                                            |
|------------------------------|---------------------------------------------|------------------------------------------------------------------------------------------------------------|-----------------------------------------------------------------------------------------------------------------------------|----------------------------------------------------------------------------------|---------------------------------------------|-----------------------------------------------------|----------------------------------------------------------------------------------------------------------------------------------------------------------------------------------------------|
| Maschio et al., 2019 [31]    | Prospective randomized clinical trial       | 33 MM patients                                                                                             | NCI CTCAE (grade 0); VAS (grade 0)                                                                                          | Docosahexaenoic acid and $\alpha$ -lipoic acid                                   | NCS; VAS NCI CTCAE; TNS-R; EORTC QLQ-CIPN20 | Baseline and 6 months from treatment                | The mean VAS, NCI CTCAE, TNS-R, and EORTC CIPN-20 scores were significantly higher at 6 months than those at baseline                                                                        |
| Mendoza et al., 2020 [32]    | Cross-sectional study                       | 20 MM patients treated with bortezomib                                                                     | Positive response to: "Are you experiencing any unusual feelings in your hands or feet related to therapy for your cancer?" | -                                                                                | TNAS; EORTC QLQ-CIPN20                      | At the time of referral                             | Correlation coefficients for the 9-item TNAS and EORTC-CIPN20 were 0.69 for the sensory subscale, 0.70 for the motor subscale, and 0.32 for the autonomic subscale, indicating good validity |
| Yan et al., 2020 [33]        | Prospective interventional single-arm study | 6 MM patients received 4–6 treatment cycles with subcutaneous bortezomib-based chemotherapy                | NCS; FACT/GOG-NTX; NCI CTCAE                                                                                                | Rat nerve growth factor combined with vitamin B                                  | FACT/GOG-NTX                                | Before chemotherapy and after 2 months of treatment | FACT/GOG-NTX questionnaire scores in the treatment and control groups decreased, and symptom alleviation was more obvious in the treatment group                                             |
| Maschio et al., 2022 [34]    | Prospective randomized clinical trial       | 16 MM patients treated with bortezomib with baseline normal neurological evaluation without symptoms of PN | NCI CTCAE                                                                                                                   | Nutraceutical compound composed of nervonic acid, curcuma rizoma, and l-Arginine | NCS; VAS NCI CTCAE; TNS-R; EORTC QLQ-CIPN20 | Baseline and 6 months from treatment                | The mean VAS, NCI CTCAE, TNS-R, and EORTC CIPN-20 scores were significantly higher at 6 months than those at baseline                                                                        |
| Oortgiesen et al., 2023 [35] | Prospective cohort study                    | 35 MM patients with inadequate 25-hydroxyvitamin D levels                                                  | ICPNQ                                                                                                                       | Oral vitamin D 3 for 6 months                                                    | ICPNQ                                       | Baseline and 2 and 6 months from treatment          | The percentage of patients with any-grade PN decreased from 88.6% at baseline to 80% after 6 months; in 37% of the patients, the PN grade improved after 6 months                            |
| Statler et al., 2023 [36]    | Abstract                                    | 12 MM patients previously received a bortezomib-containing regimen                                         | EORTC QLQ-CIPN20                                                                                                            | Cryocompression therapy                                                          | EORTC QLQ-CIPN20                            | Baseline and weeks 4 and 8                          | Total QLQ-CIPN20 scores significantly decreased at weeks 4 and 8                                                                                                                             |

**Supplementary Table 3. Continued**

| Author, year                    | Study design                      | Patients                                                       | Diagnostic tool(s)           | Intervention                                           | Evaluative tool(s)         | Assessment interval                                                                                        | Reported outcomes                                                                                                                                        |
|---------------------------------|-----------------------------------|----------------------------------------------------------------|------------------------------|--------------------------------------------------------|----------------------------|------------------------------------------------------------------------------------------------------------|----------------------------------------------------------------------------------------------------------------------------------------------------------|
| Yan et al., 2023 [37]           | Retrospective observational study | 30 MM patients treated with bortezomib or ixazomib and/or IMiD | NCI CTCAE (grade 2 or above) | Repetitive transcranial magnetic stimulation treatment | VAS; EORTC QLQ-CIPN20; NCS | Pretreatment (1–3 days before the start of treatment) and post-treatment (1 week after the last treatment) | EORTC-CIPN20-item scale data revealed significant reductions in scores; there were enhancements in both motor conduction and sensory conduction velocity |
| Moreno-Alonso et al., 2024 [38] | Case series                       | 7 MM patients with bortezomib- and/or thalidomide-induced PN   | -                            | Adhesive capsaicin 8% patch                            | NRS                        | 7 Days after patch application                                                                             | The average NRS score decreased 7 days after patch application                                                                                           |

MM, multiple myeloma; NCS, nerve conduction study; NCI CTCAE, National Cancer Institute Common Terminology Criteria for Adverse Events; FACT/GOG-NTX, Functional Assessment of Cancer Therapy/Gynecologic Oncology Group–Neurotoxicity; TNS-R, Reduced version of Total Neuropathic Score; VAS, visual analog scale; PN, peripheral neuropathy; NRS, numerical rating scale; CINAS, chemotherapy-induced neuropathy assessment scale; TNS-C, Total Neuropathy Score clinical version; NPI, Neuropathic Pain index; GP, Grooved Pegboard; BPI-SF, Brief Pain Inventory – Short Form; NPS, Neuropathy Pain Scale; EORTC QLQ-CIPN20, European Organization for Research and Treatment of Cancer Quality of Life Questionnaire–Chemotherapy-Induced Peripheral Neuropathy; TNAS, Treatment-induced Neuropathy Assessment Scale; ICPNQ, Indication for Common Toxicity Criteria Grading of Peripheral Neuropathy Questionnaire; IMiD, immunomodulatory drug.
